# Supplementary material for: Glycemic control among patients in China with type 2 diabetes mellitus receiving oral drugs or injectables
Source: BMC Public Health. 2013 Jun 21;13:602. doi: 10.1186/1471-2458-13-602 (PMC3729491; doi:10.1186/1471-2458-13-602)
Supplement: Additional file 1 — HbA1c Surveillance Registration Form. [file 1471-2458-13-602-S1.docx]

**Appendix.** HbA1c Surveillance Registration Form

**Instructions**

This questionnaire consists of 3 pages. The objective is to collect your general information, diabetes treatment information, and other relevant disease information. Please answer the following questions that are relevant to your diabetes status. Some questions might not be applicable to you, or some questions may seem similar, but please make sure to answer each question.

Please read each question and provide the answer that you believe is correct. If you are not sure how to respond, please give us your best answer in your opinion. All the information you provided will be confidential and will be used for scientific research. There will be no link between your information and your identity.

Collecting this information will not affect your current or future treatment.

This questionnaire will take you 10 minutes. Thank you for your participation and support.

**Participant signature:**

Has the subject met the following inclusion/exclusion criteria?Yes□1 No□2If “yes,” please go on with the survey. If “no,” please stop.

**Inclusion criteria**

1. Type 2 diabetes, male or female, age ≥18 years
2. Currently under one of the following treatments for diabetes: OAD only, OAD combined with insulin, or OAD combined with GLP-1 receptor agonists
3. At least one outpatient medical record for diabetes
4. Live in local area for at least 6 consecutive months
5. For community hospitals, a patient must have HbA1c examination from the same community hospital where he/she is recruited, and did not visit referral hospital in the last 3 months
6. The first 7 patients who visit the investigator each day will be eligible

**Exclusion criteria**

1. Secondary diabetes
2. Lifestyle intervention only
3. Chinese herbal medicine only
4. Insulin only
5. Inpatients
6. Type 1 diabetes
7. Pregnant, breast-feeding women
8. Mental incapacity or other reasons precluding adequate understanding or cooperation in the study

**Visit date (compulsory):** |__|__|__|__|year|__|__|month|__|__|day

**Basic information (compulsory):**

Sex: □1Male □2Female Age: |______| years Height: |______| cm Weight: |______| kg
SBP/DBP: |______|/|______|mmHg (still)
Lipid profile (latest in recent 3 months): TG: |__|__|.|__|__| mmol/L TC: |__|__|.|__|__| mmol/L
LDL: |__|__|.|__|__| mmol/L

**Date of diabetes diagnosis (compulsory):** |__|__|__|__|year|__|__|month

**Glycemic control at diagnosis (compulsory):**

HbA1c: |__|__|.|__|__|% FPG: |__|__|.|__|__| mmol/L 2hPPG: |__|__|.|__|__| mmol/L

**Current glycemic control (compulsory):**

| **Parameters** | **Values** | **Date** (latest in recent 3 months) |
| --- | --- | --- |
| HbA1c | |__|__|.|__|__|% | |__|__|__|__|year|__|__|month|__|__|day| |
| FPG | |__|__|.|__|__| mmol/L | |__|__|__|__|year|__|__|month|__|__|day| |
| 2hPPG | |__|__|.|__|__| mmol/L | |__|__|__|__|year|__|__|month|__|__|day| |
| Did you test your blood sugar in the last week? Yes□1 No□2 If “yes,” please fill in how many times you tested last week: | | time(s). | | |

**Treatment regimena (compulsory):**

| **Your current treatment regimen** | □11 OAD only □22 OADs □33 OADs □4 ≥4 OADs  □5OAD+insulin □6OAD＋GLP-1 | |
| --- | --- | --- |
| **Please tick the drug you are using now**  (Please multi-select if you are using several OADs)  **The date of beginning of the treatment?**  |__|__|__|__|year|__|__|month| | □1.1Gliclazid □1.2Glimepiride □1.3Glibenclamide □1.4 Xiaokewan [combination pill of glibenclamide and Chinese herb] □1.5Glipizide □1.6Gliquidone □1.7Repaglinide □1.8Nateglinide □1.9Mitiglinide □1.10Metformin □1.11Rosiglitazone □1.12Pioglitazone □1.13Acarbose □1.14Voglibose □1.15 Miglitol □1.16 Sitagliptin □1.17 GLP-1 (non-OAD) □1.18others (please specify) |_______________________| | |
| **If you are receiving OAD+insulin treatment, please tick the type of the insulin you are using**  (Please multi-select if you are using several insulins)  **The date of insulin initiation**  |__|__|__|__|year|__|__|month|  **The reason for insulin initiation**  □1OAD ineffective  □2Complication  □3Patient requests  □4Other reason | Short-acting human insulin | □2.1Novolin R □2.2Humulin R □2.3Ganshulin R □2.4SciLin R □2.5Wanbanglin R [biosimilar] |
| Intermediate-acting human insulin | □2.6Humulin N □2.7Novolin N □2.8Ganshulin N □2.9SciLin N □2.10Wanbanglin N [biosimilar] |
| Premixes, human insulin | □2.11Novolin 30R □2.12Novolin50R □2.13Humulin 70/30 □2.14Ganshulin 30R □2.15SciLin M30 □2.16Wanbanglin 30R [biosimilar] |
| Rapid-acting insulin analogue | □2.17NovoRapid □2.18Humalog |
| Long-acting insulin analogue | □2.19Levemir □2.20Lantus □2.21Basalin |
| Insulin analogue premixes | □2.22 NovoMix 30 □2.23Humalog 25 □2.24 Humalog 50 |
| Animal insulin | Please specify the brand name|_____________________________| |
| Other insulin | Please specify the brand name|_____________________________| |
| **Total dosage of insulin per day: |**_____________| (U/day) | |

C**oncomitant disease (compulsory):**

| **Do you have the following disease(s)?** □1Yes □2No □3Don’t know If“yes,” please tick the diagnosis (multi-selectable) and date. | |
| --- | --- |
| □1 Hypertension | Diagnosis date: |__|__|__|__|year|__|__|month or □3Don’t know |
| □2 Coronary heart disease (angina pectoris, MI, etc) | Diagnosis date: |__|__|__|__|year|__|__|month or □3Don’t know |
| □3 Dyslipidemia | Diagnosis date: |__|__|__|__|year|__|__|month or □3Don’t know |
| □4 Cerebrovascular disease: cerebral infarction (stroke, hemiplegia, etc) | Diagnosis date: |__|__|__|__|year|__|__|month or □3Don’t know |
| □5 Diabetic retinopathy | Diagnosis date: |__|__|__|__|year|__|__|month or □3Don’t know |
| □6 Diabetic neuropathy | Diagnosis date: |__|__|__|__|year|__|__|month or □3Don’t know |
| □7 Diabetic nephropathy | Diagnosis date: |__|__|__|__|year|__|__|month or □3Don’t know |
| □8 Diabetic foot (uncured/unhealed ulcer) | Diagnosis date: |__|__|__|__|year|__|__|month or □3Don’t know |
| □9 Other diagnosed disease(s), please specify: _______________ | Diagnosis date: |__|__|__|__|year|__|__|month or □3Don’t know |

[aNote: drug names have been supplied in English where possible.]

**Investigator signature:**
